# Supplementary material for: The complete mt genomes of Lutzia halifaxia, Lt. fuscanus and Culex pallidothorax (Diptera: Culicidae) and comparative analysis of 16 Culex and Lutzia mt genome sequences
Source: PubMed Central journal article supplement (PMC6660957; doi:10.1186/s13071-019-3625-2), 2019-07-26
Supplement: 13071_2019_3625_MOESM1_ESM.pdf [file 13071_2019_3625_MOESM1_ESM.pdf]

**Table S1. Composition and skewness of 16 *Culex* and *Lutzia* mt genomes.**

| Genus/Subgenus           | Species                         | A%    | T%    | G%    | C%    | A+T%  | AT-Skew | GC-Skew |
|--------------------------|---------------------------------|-------|-------|-------|-------|-------|---------|---------|
| Mitogenomes (without CR) |                                 |       |       |       |       |       |         |         |
| <i>Lutzia</i>            | <i>Lt. halifaxia</i>            | 39.28 | 38.68 | 9.30  | 12.74 | 77.96 | 0.0078  | -0.1613 |
|                          | <i>Lt. fuscianus</i>            | 39.70 | 38.70 | 9.10  | 12.60 | 78.40 | 0.0128  | -0.1559 |
| <i>Culiciomyia</i>       | <i>Cx. pallidothorax</i>        | 39.70 | 38.80 | 9.10  | 12.70 | 78.50 | 0.0078  | -0.1651 |
| <i>Culex</i>             | <i>Cx. coronator</i>            | 39.31 | 38.72 | 9.32  | 12.66 | 78.02 | 0.0075  | -0.1520 |
|                          | <i>Cx. usquatissimus</i> AC     | 39.29 | 38.72 | 9.36  | 12.63 | 78.01 | 0.0073  | -0.1488 |
|                          | <i>Cx. usquatissimus</i> RO     | 39.28 | 38.72 | 9.35  | 12.65 | 78.00 | 0.0072  | -0.1499 |
|                          | <i>Cx. usquatu</i>              | 39.35 | 38.75 | 9.26  | 12.64 | 78.10 | 0.0076  | -0.1540 |
|                          | <i>Cx. camposi</i>              | 39.38 | 38.78 | 9.28  | 12.56 | 78.16 | 0.0076  | -0.1504 |
|                          | <i>Cx. p. pipiens</i>           | 39.36 | 38.27 | 9.44  | 12.93 | 77.63 | 0.0140  | -0.1562 |
|                          | <i>Cx. pipiens</i> TU           | 39.40 | 38.31 | 9.40  | 12.89 | 77.71 | 0.1430  | -0.1568 |
|                          | <i>Cx. p. pallens</i>           | 39.39 | 38.28 | 9.41  | 12.93 | 77.66 | 0.1291  | -0.1577 |
|                          | <i>Cx. quinquefasciatus</i>     | 39.20 | 38.20 | 9.40  | 13.20 | 77.40 | 0.1393  | -0.1681 |
|                          | <i>Cx. quinquefasciatus</i> USA | 39.37 | 38.29 | 9.43  | 12.90 | 77.67 | 0.0844  | -0.1555 |
|                          | <i>Cx. tritaeniorhynchus</i> CQ | 39.11 | 38.46 | 9.40  | 13.03 | 77.57 | 0.1162  | -0.1619 |
|                          | <i>Cx. tritaeniorhynchus</i> JS | 39.20 | 38.30 | 9.40  | 12.10 | 77.50 | 0.1282  | -0.1644 |
|                          | <i>Cx. gelidus</i>              | 39.70 | 38.70 | 9.10  | 12.50 | 78.40 | 0.1154  | -0.1574 |
|                          | Average                         |       |       |       |       |       | 77.92   | 0.0107  |
| PCGs                     |                                 |       |       |       |       |       |         |         |
| <i>Lutzia</i>            | <i>Lt. halifaxia</i>            | 32.74 | 44.14 | 12.15 | 10.97 | 76.88 | -0.1483 | 0.0508  |
|                          | <i>Lt. fuscianus</i>            | 32.87 | 44.31 | 11.86 | 10.96 | 77.18 | -0.1483 | 0.0391  |
| <i>Culiciomyia</i>       | <i>Cx. pallidothorax</i>        | 32.67 | 44.45 | 12.02 | 10.86 | 77.12 | -0.1527 | 0.0506  |
| <i>Culex</i>             | <i>Cx. coronator</i>            | 32.45 | 44.62 | 12.16 | 10.77 | 77.08 | -0.1578 | 0.0606  |
|                          | <i>Cx. usquatissimus</i> AC     | 32.51 | 44.56 | 12.09 | 10.85 | 77.07 | -0.1564 | 0.0540  |
|                          | <i>Cx. usquatissimus</i> RO     | 32.48 | 44.56 | 12.14 | 10.82 | 77.04 | -0.1567 | 0.0571  |
|                          | <i>Cx. usquatu</i>              | 32.55 | 44.60 | 12.08 | 10.77 | 77.16 | -0.1562 | 0.0573  |
|                          | <i>Cx. camposi</i>              | 32.56 | 44.63 | 12.06 | 10.75 | 77.19 | -0.1563 | 0.0574  |
|                          | <i>Cx. p. pipiens</i>           | 32.11 | 44.35 | 12.47 | 11.07 | 76.47 | -0.1600 | 0.0596  |
|                          | <i>Cx. pipiens</i> TU           | 32.24 | 44.37 | 12.40 | 10.98 | 76.61 | -0.1584 | 0.0606  |
|                          | <i>Cx. p. pallens</i>           | 32.27 | 44.29 | 12.44 | 11.01 | 76.55 | -0.1570 | 0.0607  |
|                          | <i>Cx. quinquefasciatus</i>     | 32.07 | 44.25 | 12.51 | 11.17 | 76.32 | -0.1596 | 0.0568  |
|                          | <i>Cx. quinquefasciatus</i> USA | 32.21 | 44.35 | 12.43 | 11.01 | 76.56 | -0.1585 | 0.0605  |
|                          | <i>Cx. tritaeniorhynchus</i> CQ | 32.36 | 44.15 | 12.31 | 11.19 | 76.50 | -0.1541 | 0.0478  |
|                          | <i>Cx. tritaeniorhynchus</i> JS | 32.20 | 44.16 | 12.35 | 11.28 | 76.37 | -0.1566 | 0.0452  |
|                          | <i>Cx. gelidus</i>              | 32.81 | 44.74 | 11.89 | 10.56 | 77.55 | -0.1537 | 0.0591  |
|                          | Average                         |       |       |       |       |       | 76.85   | -0.1557 |
| tRNAs                    |                                 |       |       |       |       |       |         |         |
| <i>Lutzia</i>            | <i>Lt. halifaxia</i>            | 39.76 | 39.96 | 11.39 | 8.89  | 79.72 | -0.0025 | 0.1229  |
|                          | <i>Lt. fuscianus</i>            | 40.04 | 40.04 | 11.34 | 8.58  | 80.08 | 0       | 0.1390  |
| <i>Culiciomyia</i>       | <i>Cx. pallidothorax</i>        | 39.68 | 39.54 | 11.67 | 9.11  | 79.22 | 0.0017  | 0.1234  |
| <i>Culex</i>             | <i>Cx. coronator</i>            | 39.33 | 39.73 | 11.82 | 9.12  | 79.06 | -0.0051 | 0.1287  |
|                          | <i>Cx. usquatissimus</i> AC     | 39.13 | 39.73 | 11.96 | 9.18  | 78.86 | -0.0077 | 0.1312  |

|                   |                                 |       |       |       |       |       |         |         |
|-------------------|---------------------------------|-------|-------|-------|-------|-------|---------|---------|
|                   | <i>Cx. usquatissimus</i> RO     | 39.36 | 39.74 | 11.79 | 9.11  | 79.10 | -0.0049 | 0.1282  |
|                   | <i>Cx. usquatu</i>              | 39.16 | 39.44 | 12.00 | 9.40  | 78.60 | -0.0036 | 0.1212  |
|                   | <i>Cx. camposi</i>              | 39.34 | 39.74 | 11.81 | 9.11  | 79.08 | -0.0051 | 0.1290  |
|                   | <i>Cx. p. pipiens</i>           | 40.61 | 38.37 | 9.29  | 11.73 | 78.98 | 0.0283  | -0.1161 |
|                   | <i>Cx. pipiens</i> TU           | 40.54 | 38.37 | 9.36  | 11.73 | 78.92 | 0.0275  | -0.1125 |
|                   | <i>Cx. p. pallens</i>           | 40.01 | 38.93 | 11.74 | 9.31  | 78.95 | 0.0137  | 0.1154  |
|                   | <i>Cx. quinquefasciatus</i>     | 40.56 | 38.10 | 9.61  | 11.72 | 78.66 | 0.0312  | -0.0990 |
|                   | <i>Cx. quinquefasciatus</i> USA | 40.79 | 38.48 | 9.35  | 11.38 | 79.27 | 0.0291  | -0.0980 |
|                   | <i>Cx. tritaeniorhynchus</i> CQ | 39.06 | 39.73 | 12.15 | 9.06  | 78.79 | -0.0085 | 0.1456  |
|                   | <i>Cx. tritaeniorhynchus</i> JS | 39.24 | 39.78 | 11.74 | 9.23  | 79.02 | -0.0069 | 0.1197  |
|                   | <i>Cx. gelidus</i>              | 39.89 | 39.67 | 11.53 | 8.91  | 79.56 | 0.0027  | 0.1280  |
| Average           |                                 |       |       |       |       | 79.12 | 0.0056  | 0.0692  |
| rRNAs             |                                 |       |       |       |       |       |         |         |
| <i>Lutzia</i>     | <i>Lt. halifaxia</i>            | 40.25 | 42.36 | 11.29 | 6.09  | 82.61 | -0.0255 | 0.2992  |
|                   | <i>Lt. fuscianus</i>            | 40.26 | 42.52 | 11.10 | 6.11  | 82.78 | -0.0273 | 0.2896  |
| <i>Culicomyia</i> | <i>Cx. pallidothorax</i>        | 40.20 | 41.88 | 11.45 | 6.47  | 82.08 | -0.0204 | 0.2779  |
| <i>Culex</i>      | <i>Cx. coronator</i>            | 40.21 | 41.95 | 11.39 | 6.45  | 82.16 | -0.0212 | 0.2770  |
|                   | <i>Cx. usquatissimus</i> AC     | 40.16 | 41.95 | 11.44 | 6.45  | 82.11 | -0.0218 | 0.2789  |
|                   | <i>Cx. usquatissimus</i> RO     | 40.11 | 42.00 | 11.49 | 6.40  | 82.11 | -0.0229 | 0.2842  |
|                   | <i>Cx. usquatu</i>              | 40.21 | 42.04 | 11.39 | 6.36  | 82.25 | -0.0223 | 0.2838  |
|                   | <i>Cx. camposi</i>              | 40.30 | 42.14 | 11.30 | 6.26  | 82.44 | -0.0223 | 0.2869  |
|                   | <i>Cx. p. pipiens</i>           | 42.21 | 40.04 | 6.33  | 11.43 | 82.25 | 0.0264  | -0.2872 |
|                   | <i>Cx. pipiens</i> TU           | 42.26 | 40.08 | 6.28  | 11.38 | 82.34 | 0.0264  | -0.2888 |
|                   | <i>Cx. p. pallens</i>           | 40.18 | 42.28 | 11.27 | 6.27  | 82.46 | -0.0255 | 0.2853  |
|                   | <i>Cx. quinquefasciatus</i>     | 42.16 | 40.15 | 6.32  | 11.37 | 82.31 | 0.0244  | -0.2857 |
|                   | <i>Cx. quinquefasciatus</i> USA | 42.21 | 40.08 | 6.33  | 11.38 | 82.29 | 0.0258  | -0.2853 |
|                   | <i>Cx. tritaeniorhynchus</i> CQ | 40.41 | 42.04 | 11.34 | 6.21  | 82.45 | -0.0198 | 0.2926  |
|                   | <i>Cx. tritaeniorhynchus</i> JS | 41.35 | 41.12 | 8.08  | 9.45  | 82.47 | 0.0028  | -0.0777 |
|                   | <i>Cx. gelidus</i>              | 40.51 | 41.70 | 11.35 | 6.44  | 82.20 | -0.0145 | 0.2761  |
| Average           |                                 |       |       |       |       | 82.33 | -0.0086 | 0.1192  |
| CR                |                                 |       |       |       |       |       |         |         |
| <i>Lutzia</i>     | <i>Lt. halifaxia</i>            | 43.49 | 45.38 | 4.56  | 6.56  | 88.88 | -0.0213 | -0.1800 |
|                   | <i>Lt. fuscianus</i>            | 43.59 | 46.20 | 3.59  | 6.63  | 89.78 | -0.0291 | -0.2979 |
| <i>Culicomyia</i> | <i>Cx. pallidothorax</i>        | 38.66 | 48.46 | 3.78  | 9.10  | 87.11 | -0.1125 | -0.4130 |
| <i>Culex</i>      | <i>Cx. coronator</i>            | 41.63 | 47.72 | 3.18  | 7.47  | 89.35 | -0.0681 | -0.4026 |
|                   | <i>Cx. usquatissimus</i> AC     | 41.19 | 47.99 | 3.61  | 7.21  | 89.18 | -0.0762 | -0.3333 |
|                   | <i>Cx. usquatissimus</i> RO     | 41.14 | 48.34 | 3.32  | 7.20  | 89.47 | -0.0805 | -0.3684 |
|                   | <i>Cx. usquatu</i>              | 41.72 | 47.71 | 3.34  | 7.23  | 89.43 | -0.0669 | -0.3684 |
|                   | <i>Cx. camposi</i>              | 41.86 | 47.71 | 3.34  | 7.09  | 89.57 | -0.0652 | -0.3600 |
|                   | <i>Cx. p. pallens</i>           | 41.10 | 47.66 | 3.75  | 7.50  | 88.76 | -0.0739 | -0.3333 |
|                   | <i>Cx. quinquefasciatus</i>     | 40.06 | 48.44 | 3.84  | 7.67  | 88.49 | -0.0947 | -0.3333 |
|                   | <i>Cx. gelidus</i>              | 40.58 | 50.00 | 3.32  | 6.09  | 90.58 | -0.1040 | -0.2941 |
| Average           |                                 |       |       |       |       | 89.15 | -0.0720 | -0.3350 |
