# Supplementary material for: The complete mt genomes of Lutzia halifaxia, Lt. fuscanus and Culex pallidothorax (Diptera: Culicidae) and comparative analysis of 16 Culex and Lutzia mt genome sequences
Source: PubMed Central journal article supplement (PMC6660957; doi:10.1186/s13071-019-3625-2), 2019-07-26
Supplement: 13071_2019_3625_MOESM2_ESM.pdf [file 13071_2019_3625_MOESM2_ESM.pdf]

**Table S2 Relative synonymous codon usage (RSCU) in the 16 *Culex* and *Lutzia* mt genomes.**

| Amino acid | Codons | RSCU |      |      |      |      |      |      |      |      |      |      |      |      |      |      |      |
|------------|--------|------|------|------|------|------|------|------|------|------|------|------|------|------|------|------|------|
|            |        | CCA  | CCO  | LFU  | CGE  | LHA  | CPA  | CPI  | CPL  | CPT  | CQS  | CQU  | CTC  | CTJ  | CUA  | CUR  | CUS  |
| Ala        | GCU    | 2.74 | 2.84 | 2.43 | 2.27 | 2.47 | 2.74 | 2.74 | 2.47 | 2.74 | 2.74 | 2.92 | 2.80 | 2.8  | 2.82 | 2.82 | 2.77 |
|            | GCC    | 0.21 | 0.14 | 0.21 | 0.34 | 0.41 | 0.18 | 0.16 | 0.11 | 0.16 | 0.16 | 0.16 | 0.21 | 0.28 | 0.18 | 0.18 | 0.02 |
|            | GCA    | 0.98 | 0.98 | 1.32 | 1.36 | 0.93 | 0.92 | 0.98 | 1.25 | 0.98 | 0.98 | 0.82 | 0.92 | 0.87 | 0.95 | 0.95 | 0.89 |
|            | GCG    | 0.07 | 0.05 | 0.04 | 0.03 | 0.19 | 0.16 | 0.12 | 0.17 | 0.12 | 0.12 | 0.05 | 0.07 | 0.05 | 0.05 | 0.05 | 0.37 |
| Arg        | CGU    | 0.55 | 0.55 | 0.76 | 0.44 | 0.96 | 0.47 | 0.48 | 0.51 | 0.48 | 0.48 | 0.68 | 0.7  | 0.55 | 0.55 | 0.55 | 0.55 |
|            | CGC    | 0    | 0    | 0    | 0.11 | 0    | 0    | 0    | 0.09 | 0    | 0    | 0.08 | 0    | 0    | 0    | 0    | 0    |
|            | CGA    | 3.45 | 3.45 | 2.7  | 3.44 | 2.8  | 3.33 | 3.31 | 3.23 | 3.31 | 3.31 | 3.02 | 3.23 | 3.38 | 3.45 | 3.54 | 3.45 |
|            | CGG    | 0    | 0    | 0.54 | 0    | 0.24 | 0.2  | 0.21 | 0.17 | 0.21 | 0.21 | 0.23 | 0.07 | 0.07 | 0    | 0    | 0    |
| Asn        | AAU    | 1.89 | 1.87 | 1.84 | 1.61 | 1.73 | 1.81 | 1.8  | 1.87 | 1.8  | 1.8  | 1.82 | 1.83 | 1.85 | 1.89 | 1.89 | 1.87 |
|            | AAC    | 0.11 | 0.13 | 0.16 | 0.39 | 0.27 | 0.19 | 0.2  | 0.13 | 0.2  | 0.2  | 0.18 | 0.17 | 0.15 | 0.11 | 0.11 | 0.13 |
| Asp        | GAU    | 1.82 | 1.85 | 1.7  | 1.76 | 1.72 | 1.83 | 1.83 | 1.69 | 1.83 | 1.83 | 1.85 | 1.75 | 1.71 | 1.82 | 1.82 | 1.79 |
|            | GAC    | 0.18 | 0.15 | 0.3  | 0.24 | 0.28 | 0.17 | 0.17 | 0.31 | 0.17 | 0.17 | 0.15 | 0.25 | 0.29 | 0.18 | 0.18 | 0.21 |
| Cys        | UGU    | 1.95 | 1.9  | 1.89 | 1.63 | 1.75 | 1.90 | 1.95 | 1.79 | 1.95 | 1.95 | 1.7  | 2    | 1.95 | 1.86 | 1.86 | 1.95 |
|            | UGC    | 0.05 | 0.1  | 0.11 | 0.37 | 0.25 | 0.1  | 0.05 | 0.21 | 0.05 | 0.05 | 0.3  | 0    | 0.05 | 0.14 | 0.14 | 0.05 |
| Gln        | CAA    | 1.92 | 1.92 | 1.86 | 1.71 | 1.62 | 1.92 | 1.95 | 1.61 | 1.95 | 1.95 | 1.92 | 1.92 | 1.92 | 1.92 | 1.92 | 1.92 |
|            | CAG    | 0.08 | 0.08 | 0.14 | 0.29 | 0.38 | 0.08 | 0.05 | 0.39 | 0.05 | 0.05 | 0.08 | 0.08 | 0.08 | 0.08 | 0.08 | 0.08 |
| Glu        | GAA    | 1.97 | 1.97 | 1.7  | 1.71 | 1.46 | 1.92 | 1.97 | 1.47 | 1.97 | 1.97 | 1.89 | 1.92 | 1.95 | 1.97 | 1.97 | 1.97 |
|            | GAG    | 0.03 | 0.03 | 0.3  | 0.29 | 0.54 | 0.08 | 0.03 | 0.53 | 0.03 | 0.03 | 0.11 | 0.08 | 0.05 | 0.03 | 0.03 | 0.03 |
| Gly        | GGU    | 0.84 | 0.86 | 0.47 | 0.3  | 0.62 | 0.84 | 0.78 | 0.58 | 0.78 | 0.78 | 0.74 | 0.79 | 0.68 | 0.86 | 0.86 | 0.84 |
|            | GGC    | 0.02 | 0.05 | 0.02 | 0.03 | 0.06 | 0.06 | 0.05 | 0.18 | 0.05 | 0.04 | 0.11 | 0.02 | 0.07 | 0.02 | 0.02 | 0.02 |
|            | GGA    | 2.79 | 2.63 | 2.63 | 3.25 | 2.97 | 2.55 | 2.52 | 2.74 | 2.55 | 2.57 | 2.55 | 2.69 | 2.69 | 2.83 | 2.83 | 2.77 |
|            | GGG    | 0.35 | 0.46 | 0.61 | 0.3  | 0.54 | 0.55 | 0.65 | 0.49 | 0.62 | 0.62 | 0.6  | 0.50 | 0.55 | 0.29 | 0.29 | 0.37 |
| His        | CAU    | 1.71 | 1.68 | 1.73 | 0.03 | 1.67 | 1.70 | 1.68 | 1.68 | 1.68 | 1.68 | 1.63 | 1.58 | 1.53 | 1.71 | 1.63 | 1.63 |
|            | CAC    | 0.29 | 0.32 | 0.27 | 0.42 | 0.33 | 0.30 | 0.32 | 0.32 | 0.32 | 0.32 | 0.37 | 0.42 | 0.47 | 0.29 | 0.37 | 0.37 |
| Ile        | AUU    | 1.92 | 1.92 | 1.93 | 1.71 | 1.86 | 1.87 | 1.87 | 1.86 | 1.88 | 1.87 | 1.85 | 1.93 | 1.93 | 1.92 | 1.92 | 1.93 |
|            | AUC    | 0.08 | 0.08 | 0.07 | 0.29 | 0.14 | 0.13 | 0.13 | 0.14 | 0.12 | 0.13 | 0.15 | 0.07 | 0.07 | 0.08 | 0.08 | 0.07 |

|            |     |      |      |      |      |      |      |      |      |      |      |      |      |      |      |      |      |
|------------|-----|------|------|------|------|------|------|------|------|------|------|------|------|------|------|------|------|
| Leu2 (UUR) | UUA | 5.33 | 5.27 | 4.55 | 4.1  | 3.42 | 5.14 | 5.15 | 4.86 | 5.16 | 5.17 | 5.06 | 5.08 | 5.06 | 5.23 | 5.23 | 5.28 |
|            | UUG | 0.09 | 0.12 | 0.3  | 0.3  | 0.56 | 0.21 | 0.2  | 0.14 | 0.2  | 0.19 | 0.21 | 0.24 | 0.22 | 0.11 | 0.11 | 0.1  |
| Leu1 (CUN) | CUU | 0.4  | 0.4  | 0.68 | 0.48 | 1.14 | 0.39 | 0.4  | 1.98 | 0.4  | 0.4  | 0.42 | 0.34 | 0.33 | 0.4  | 0.4  | 0.4  |
|            | CUC | 0    | 0    | 0.06 | 0.25 | 0.15 | 0.01 | 0    | 0.15 | 0    | 0    | 0.03 | 0    | 0.01 | 0    | 0    | 0    |
|            | CUA | 0.18 | 0.2  | 0.3  | 0.79 | 0.44 | 0.25 | 0.25 | 1.52 | 0.24 | 0.24 | 0.28 | 0.34 | 0.39 | 0.26 | 0.26 | 0.22 |
|            | CUG | 0    | 0.01 | 0.11 | 0.1  | 0.29 | 0.01 | 0    | 0.34 | 0    | 0    | 0    | 0    | 0    | 0    | 0    | 0    |
|            | AAA | 1.38 | 1.43 | 1.75 | 1.63 | 1.68 | 1.53 | 1.78 | 1.59 | 1.51 | 1.51 | 1.45 | 1.47 | 1.38 | 1.34 | 1.34 | 1.36 |
| Lys        | AAG | 0.62 | 0.57 | 0.25 | 0.37 | 0.32 | 0.47 | 0.22 | 0.41 | 0.49 | 0.49 | 0.55 | 0.53 | 0.62 | 0.66 | 0.66 | 0.64 |
|            | AUA | 1.8  | 1.8  | 1.74 | 1.83 | 1.62 | 1.81 | 1.51 | 1.74 | 1.8  | 1.79 | 1.77 | 1.79 | 1.79 | 1.77 | 1.77 | 1.8  |
| Met        | AUG | 0.2  | 0.2  | 0.26 | 0.17 | 0.38 | 0.19 | 0.49 | 0.26 | 0.2  | 0.21 | 0.23 | 0.21 | 0.21 | 0.23 | 0.23 | 0.2  |
|            | UUU | 1.83 | 1.84 | 1.86 | 1.66 | 1.7  | 1.85 | 1.83 | 1.73 | 1.83 | 1.83 | 1.75 | 1.74 | 1.74 | 1.82 | 1.82 | 1.84 |
| Phe        | UUC | 0.17 | 0.16 | 0.14 | 0.34 | 0.3  | 0.15 | 0.17 | 0.27 | 0.17 | 0.17 | 0.25 | 0.26 | 0.26 | 0.18 | 0.18 | 0.16 |
|            | CCU | 2.34 | 2.31 | 2.09 | 2.03 | 2.02 | 2.32 | 2.29 | 2.82 | 2.27 | 2.27 | 2.21 | 2.26 | 2.33 | 2.31 | 2.31 | 2.31 |
| Pro        | CCC | 0.16 | 0.19 | 0.65 | 0.71 | 0.63 | 0.22 | 0.22 | 0.31 | 0.22 | 0.22 | 0.2  | 0.34 | 0.28 | 0.19 | 0.19 | 0.16 |
|            | CCA | 1.5  | 1.47 | 1.2  | 1.19 | 1.3  | 1.46 | 1.49 | 0.86 | 1.51 | 1.48 | 1.55 | 1.4  | 1.39 | 1.47 | 1.47 | 1.53 |
|            | CCG | 0    | 0.03 | 0.07 | 0.07 | 0.04 | 0    | 0    | 0    | 0    | 0.03 | 0.03 | 0    | 0    | 0.03 | 0.03 | 0    |
|            | UCU | 2.54 | 2.52 | 2.92 | 1.89 | 2.71 | 2.64 | 2.7  | 1.83 | 2.69 | 2.71 | 2.49 | 2.63 | 2.72 | 2.52 | 2.52 | 2.54 |
| Ser1 (UCN) | UCC | 0.05 | 0.05 | 0.18 | 0.74 | 0.2  | 0.18 | 0.13 | 0.25 | 0.13 | 0.13 | 0.31 | 0.15 | 0.08 | 0.05 | 0.05 | 0.05 |
|            | UCA | 2.54 | 2.55 | 2.14 | 2.13 | 2.35 | 2.08 | 2.17 | 1.89 | 2.16 | 2.18 | 1.81 | 2.25 | 2.26 | 2.55 | 2.55 | 2.54 |
|            | UCG | 0.03 | 0.05 | 0.09 | 0.13 | 0.21 | 0.13 | 0.13 | 0.02 | 0.13 | 0.1  | 0.17 | 0.03 | 0.08 | 0.05 | 0.05 | 0.03 |
|            | AGU | 1.83 | 1.83 | 1.23 | 1.2  | 1.25 | 1.78 | 1.77 | 2.1  | 1.81 | 1.78 | 1.57 | 1.63 | 1.74 | 1.83 | 1.83 | 1.83 |
| Ser2 (AGN) | AGC | 0.1  | 0.05 | 0.15 | 0.66 | 0.2  | 0.10 | 0.1  | 0.5  | 0.08 | 0.1  | 0.22 | 0.15 | 0.1  | 0.05 | 0.05 | 0.08 |
|            | AGA | 0.91 | 0.94 | 1.2  | 1.01 | 0.82 | 1.04 | 1    | 1.08 | 1.01 | 1    | 1.04 | 1.1  | 1.03 | 0.94 | 0.94 | 0.94 |
|            | AGG | 0    | 0    | 0.09 | 0.24 | 0.35 | 0.05 | 0    | 0.37 | 0    | 0    | 0.39 | 0.07 | 0    | 0    | 0    | 0    |
|            | ACU | 2.26 | 2.24 | 1.67 | 2    | 1.91 | 2.06 | 2.03 | 2.16 | 2.04 | 2.03 | 1.96 | 2.08 | 2.14 | 2.25 | 2.25 | 2.26 |
| Thr        | ACC | 0.02 | 0.04 | 0.31 | 0.25 | 0.38 | 0.08 | 0.08 | 0.16 | 0.08 | 0.08 | 0.17 | 0.13 | 0.1  | 0.02 | 0.02 | 0.02 |
|            | ACA | 1.72 | 1.7  | 1.95 | 1.69 | 1.71 | 1.86 | 1.86 | 1.51 | 1.87 | 1.86 | 1.83 | 1.77 | 1.74 | 1.71 | 1.71 | 1.72 |
|            | ACG | 0    | 0.02 | 0.07 | 0.06 | 0    | 0    | 0.02 | 0.18 | 0    | 0.02 | 0.04 | 0.02 | 0.02 | 0.02 | 0.02 | 0    |
|            | UGA | 1.83 | 1.83 | 1.23 | 1.91 | 1.88 | 1.92 | 1.9  | 1.92 | 1.92 | 1.9  | 1.92 | 1.98 | 2    | 1.83 | 1.83 | 1.83 |
| Trp        | UGG | 0.1  | 0.05 | 0.15 | 0.09 | 0.12 | 0.08 | 0.1  | 0.08 | 0.08 | 0.1  | 0.08 | 0.02 | 0    | 0.05 | 0.05 | 0.08 |
|            | UAU | 0.91 | 0.94 | 1.2  | 1.66 | 1.66 | 1.82 | 1.83 | 1.82 | 1.83 | 1.83 | 1.79 | 1.83 | 1.87 | 0.94 | 0.94 | 0.94 |

|     |     |      |      |      |      |      |      |      |      |      |      |      |      |      |      |      |      |
|-----|-----|------|------|------|------|------|------|------|------|------|------|------|------|------|------|------|------|
|     | UAC | 0    | 0    | 0.09 | 0.34 | 0.34 | 0.18 | 0.17 | 0.18 | 0.17 | 0.17 | 0.21 | 0.17 | 0.13 | 0    | 0    | 0    |
| Val | GUU | 1.89 | 1.91 | 1.8  | 1.74 | 1.89 | 2.04 | 2.06 | 2.04 | 2.07 | 2.06 | 1.96 | 2.02 | 1.94 | 1.88 | 1.88 | 1.9  |
|     | GUC | 0    | 0    | 0.09 | 0.12 | 0.11 | 0.08 | 0.08 | 0.08 | 0.08 | 0.08 | 0.17 | 0.08 | 0.12 | 0.02 | 0.02 | 0    |
|     | GUA | 2.03 | 2.01 | 1.98 | 2.05 | 1.54 | 1.76 | 1.75 | 1.76 | 1.74 | 1.76 | 1.77 | 1.82 | 1.84 | 2.02 | 2.02 | 2.02 |
|     | GUG | 0.08 | 0.08 | 0.13 | 0.09 | 0.46 | 0.12 | 0.1  | 0.12 | 0.10 | 0.1  | 0.11 | 0.08 | 0.1  | 0.08 | 0.08 | 0.88 |

CCA: *Cx. camposi*, CCO: *Cx. coronator*, LFU: *Lt. fuscus*, CGE: *Cx. gelidus*, LHA: *Lt. halifaxia*, CPA: *Cx. p. pallens*, CPI: *Cx. p. pipiens*, CPL: *Cx. pallidothorax*, CPT: *Cx. pipiens* TU, CQS: *Cx. quinquefasciatus* USA, CQU: *Cx. quinquefasciatus*, CTC: *Cx. tritaeniorhynchus* CQ, CTJ: *Cx. tritaeniorhynchus* JS, CUA: *Cx. usquatissimus* AC, CUR: *Cx. usquatissimus* RO, CUS: *Cx. usquatus*.
