# Supplementary material for: The complete mt genomes of Lutzia halifaxia, Lt. fuscanus and Culex pallidothorax (Diptera: Culicidae) and comparative analysis of 16 Culex and Lutzia mt genome sequences
Source: PubMed Central journal article supplement (PMC6660957; doi:10.1186/s13071-019-3625-2), 2019-07-26

**Figure S1. Predicted secondary structures for 22 tRNAs in *Lt. fuscans* (A), *Lt. halifaxia* (B) and *Cx. pallidothorax* (C) mt genomes. Nucleotides highlighted in red indicate mismatch.**

**A**

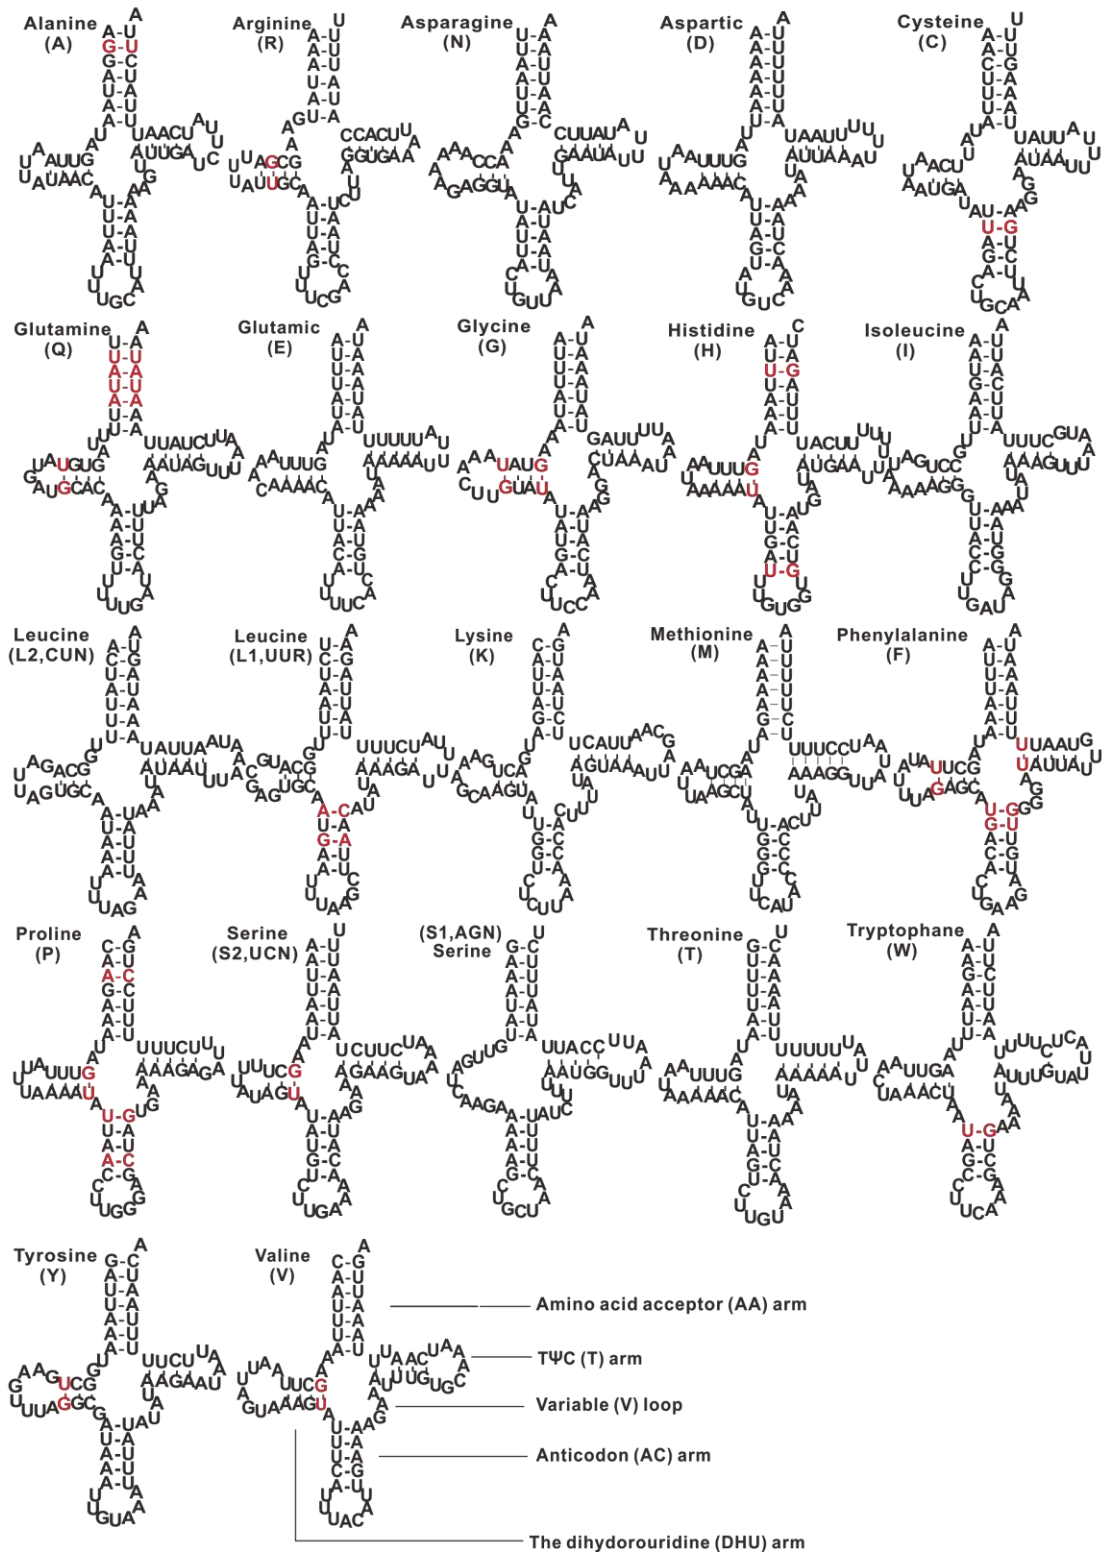

**B**

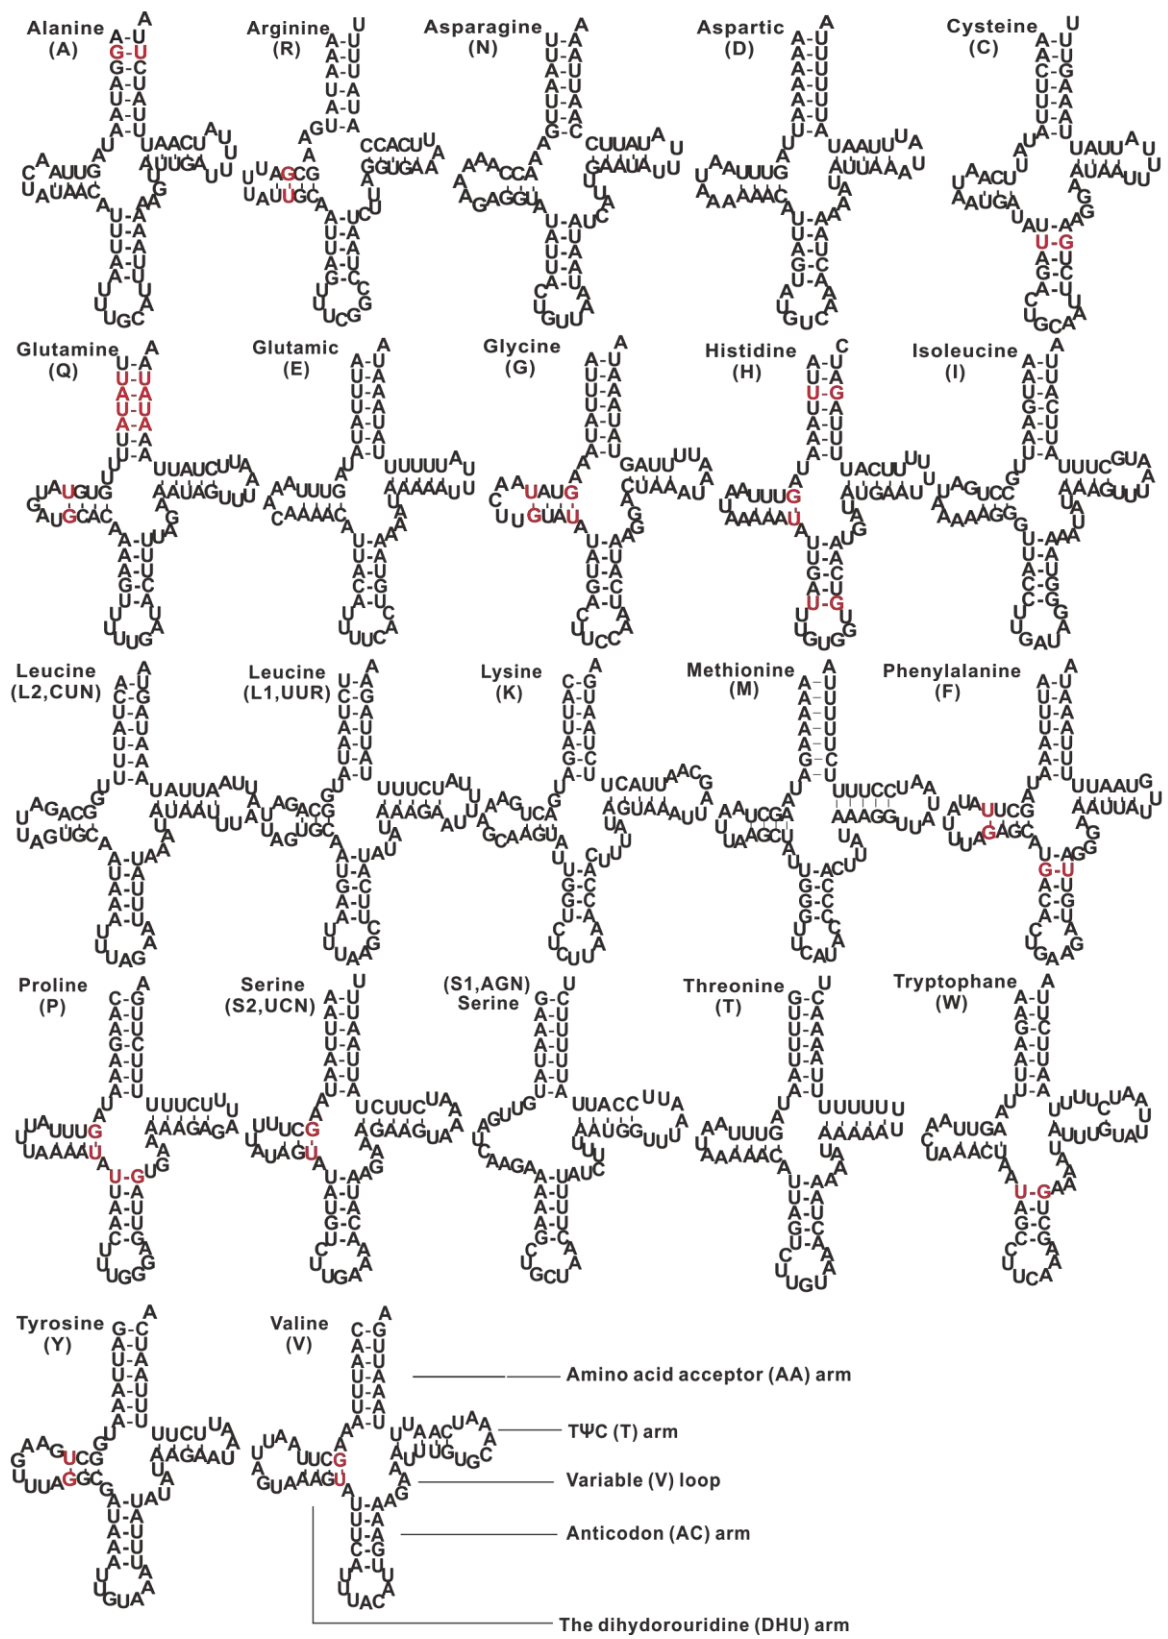

C

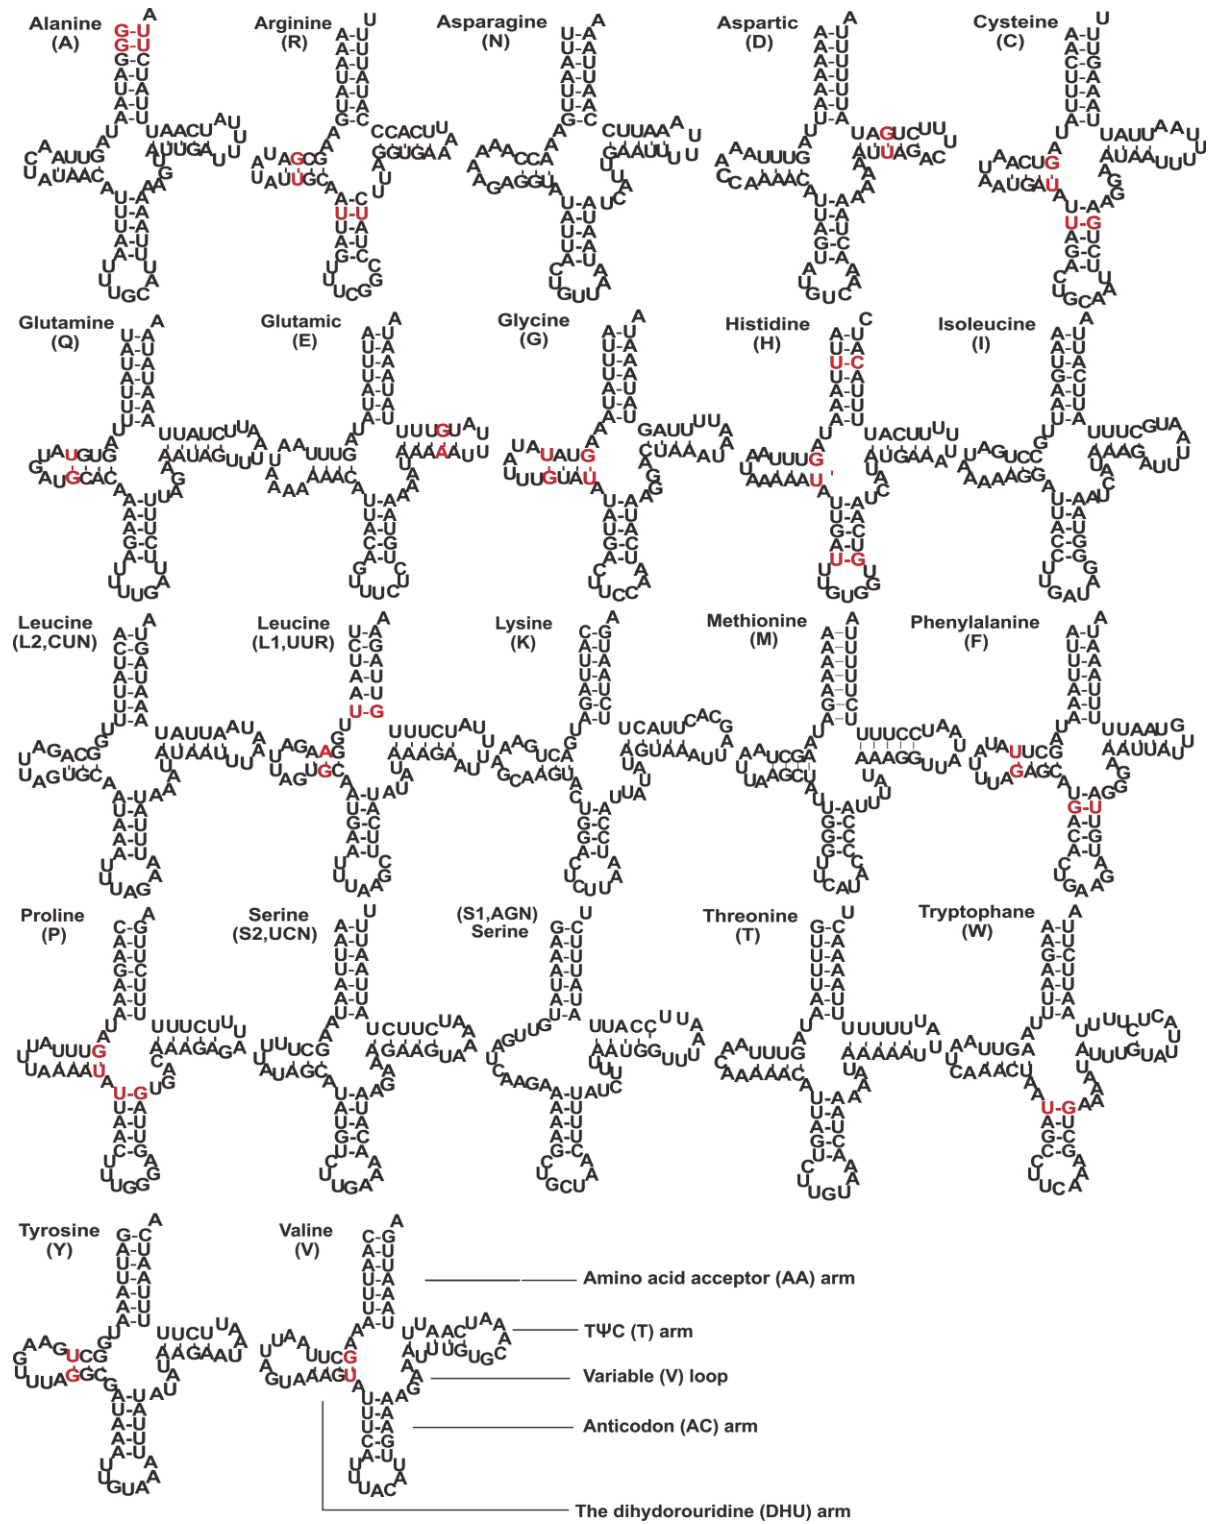

Supplement: 13071_2019_3625_MOESM3_ESM.pdf [file 13071_2019_3625_MOESM3_ESM.pdf]
