# Supplementary material for: The complete mt genomes of Lutzia halifaxia, Lt. fuscanus and Culex pallidothorax (Diptera: Culicidae) and comparative analysis of 16 Culex and Lutzia mt genome sequences
Source: PubMed Central journal article supplement (PMC6660957; doi:10.1186/s13071-019-3625-2), 2019-07-26
Supplement: 13071_2019_3625_MOESM4_ESM.pdf [file 13071_2019_3625_MOESM4_ESM.pdf]

**Table S3. Best-fit models chosen under Akaike Information Criterion by Modeltest for each of the 13 PCGs.**

| Gene         | Best-fit model |
|--------------|----------------|
| <i>Atp6</i>  | GTR+I          |
| <i>Atp8</i>  | GTR+I          |
| <i>Cox1</i>  | GTR+I+G        |
| <i>Cox2</i>  | TVMef+G        |
| <i>Cox3</i>  | TIM2+G         |
| <i>Cob</i>   | TrN+G          |
| <i>Nad1</i>  | TPM1uf+I       |
| <i>Nad2</i>  | TVM+G          |
| <i>Nad3</i>  | TPM1uf+I       |
| <i>Nad4</i>  | TIM3+G         |
| <i>Nad4l</i> | F81            |
| <i>Nad5</i>  | TIM1+I+G       |
| <i>Nad6</i>  | TPM1uf+G       |
